# Supplementary material for: Gene expression profiling analysis of lung adenocarcinoma
Source: PubMed Central journal article supplement (PMC4763816; doi:10.1590/1414-431x20154861), 2016-02-02
Supplement: 1414-431X-bjmbr-1414-431X20154861-S1.pdf [file 1414-431X-bjmbr-1414-431X20154861-S1.pdf]

**Table S1.** Enriched functions for upregulated differentially expressed genes (DEGs) with an enrichment score >2.5.

| Enrichment score/<br>Term | Description                                                                                    | Count | P        | DEGs                                                                                       |
|---------------------------|------------------------------------------------------------------------------------------------|-------|----------|--------------------------------------------------------------------------------------------|
| 5.258                     |                                                                                                |       |          |                                                                                            |
| GO:0006091                | Generation of precursor metabolites and energy                                                 | 37    | 1.21E-07 | <i>UQCRC2, ATP5D, TMX1, NDUFB8, PHKB, TMX4, ATP6AP1, NDUFB1, CYB561D2, NDUFS...</i>        |
| GO:0006119                | Oxidative phosphorylation                                                                      | 18    | 3.51E-07 | <i>UQCRC2, ATP5D, NDUFA2, NDUFB8, ATP6AP1, NDUFA7, ATP6VIH, ATP6V1D, NDUFA1, NDUFB1...</i> |
| GO:0015980                | Energy derivation by oxidation of organic compounds                                            | 22    | 1.73E-06 | <i>UQCRC2, NDUFA2, NDUFB8, PHKB, NDUFA7, CS, CRAT, PPP1CC, NDUFA1, NDUFB1...</i>           |
| GO:0006120                | Mitochondrial electron transport, NADH to ubiquinone                                           | 10    | 1.06E-05 | <i>NDUFS7, NDUFA2, NDUFB8, NDUFV1, NDUFV2, NDUFA7, DLD, NDUFS3, NDUFA1, NDUFB1</i>         |
| GO:0045333                | Cellular respiration                                                                           | 16    | 1.33E-05 | <i>UQCRC2, NDUFA2, NDUFB8, CS, NDUFA7, NDUFA1, NDUFB1, NDUFS7, NNT, UQCRC1...</i>          |
| GO:0042775                | Mitochondrial ATP synthesis coupled electron transport                                         | 11    | 1.77E-05 | <i>NDUFS7, NDUFA2, UQCRC1, NDUFB8, NDUFV1, NDUFV2, NDUFA7, DLD, NDUFS3, NDUFA1...</i>      |
| GO:0042773                | ATP synthesis coupled electron transport                                                       | 11    | 1.77E-05 | <i>NDUFS7, NDUFA2, UQCRC1, NDUFB8, NDUFV1, NDUFV2, NDUFA7, DLD, NDUFS3, NDUFA1...</i>      |
| GO:0042773                | Respiratory electron transport chain                                                           | 12    | 1.77E-05 | <i>NDUFS7, NDUFA2, SLC1A3, UQCRC1, NDUFB8, NDUFV1, NDUFV2, NDUFA7, DLD, NDUFS3...</i>      |
| GO:0055114                | Oxidation reduction                                                                            | 41    | 6.81E-04 | <i>UQCRC2, TMX1, NDUFB8, TMX4, PRDX3, PRDX1, NDUFB1, CYB561D2, NDUFS7, SLC1A3...</i>       |
| 4.449                     |                                                                                                |       |          |                                                                                            |
| GO:0006396                | RNA processing                                                                                 | 50    | 3.89E-09 | <i>RPP38, RPL14, SYNCRIP, INTS1, ZNF638, SFRS2B, DDX23, RRP1B, CLP1, LSM4...</i>           |
| GO:0008380                | RNA splicing                                                                                   | 33    | 3.27E-07 | <i>POLR2G, POLR2F, STRAP, SYNCRIP, ZNF638, IVNSIABP, PRPF19, SFRS2B, DDX23, FRG1...</i>    |
| GO:0006397                | mRNA processing                                                                                | 33    | 3.31E-06 | <i>POLR2G, POLR2F, STRAP, SYNCRIP, PRPF19, SFRS2B, DDX23, FRG1, CLP1, DHX15...</i>         |
| GO:0016071                | mRNA metabolic process                                                                         | 33    | 5.19E-05 | <i>POLR2G, POLR2F, STRAP, SYNCRIP, PRPF19, SFRS2B, DDX23, FRG1, CLP1, DHX15...</i>         |
| GO:0000375                | RNA splicing, via transesterification reactions                                                | 16    | 6.92E-03 | <i>PABPN1, POLR2G, DHX9, POLR2F, PTBP1, HNRNPA2B1, HNRNPR, PAPOLA, DDX23, CLP1...</i>      |
| GO:0000377                | RNA splicing, via transesterification reactions with bulged adenosine as nucleophile           | 16    | 6.92E-03 | <i>PABPN1, POLR2G, DHX9, POLR2F, PTBP1, HNRNPA2B1, HNRNPR, PAPOLA, DDX23, CLP1...</i>      |
| GO:0000398                | Nuclear mRNA splicing, via spliceosome                                                         | 16    | 6.92E-03 | <i>PABPN1, POLR2G, DHX9, POLR2F, PTBP1, HNRNPA2B1, HNRNPR, PAPOLA, DDX23, CLP1...</i>      |
| 3.040                     |                                                                                                |       |          |                                                                                            |
| GO:0006511                | Ubiquitin-dependent protein catabolic process                                                  | 24    | 3.82E-05 | <i>PSMB10, USP7, RAD23B, UBE2A, UFD1L, PPP2R5C, UBE2I, UBE2C, CCNB1, PSMC6...</i>          |
| GO:0010498                | Proteasomal protein catabolic process                                                          | 15    | 1.26E-04 | <i>PSMB10, RAD23B, PPP2R5C, UBE2C, CCNB1, PSMC6, PSMD13, PSMC5, PSMB6, PSME1...</i>        |
| GO:0043161                | Proteasomal ubiquitin-dependent protein catabolic process                                      | 15    | 1.26E-04 | <i>PSMB10, RAD23B, PPP2R5C, UBE2C, CCNB1, PSMC6, PSMD13, PSMC5, PSMB6, PSME1...</i>        |
| GO:0009057                | Macromolecule catabolic process                                                                | 46    | 1.38E-04 | <i>PSMB10, USP7, RAD23B, SPG7, PPP2R5C, RNASEH1, UBE3C, DNASE1L1, RPA2, UBE2D2...</i>      |
| GO:0044265                | Cellular macromolecule catabolic process                                                       | 42    | 2.84E-04 | <i>PSMB10, USP7, RAD23B, PPP2R5C, RNASEH1, UBE3C, DNASE1L1, RPA2, UBE2D2, PSMB6...</i>     |
| GO:0019941                | Modification-dependent protein catabolic process                                               | 33    | 2.99E-04 | <i>PSMB10, USP7, RAD23B, PPP2R5C, UBE3C, PSMB6, UBE2D2, CUL7, CUL9, FBXO28...</i>          |
| GO:0043632                | Modification-dependent macromolecule catabolic process                                         | 33    | 2.99E-04 | <i>PSMB10, USP7, RAD23B, PPP2R5C, UBE3C, PSMB6, UBE2D2, CUL7, CUL9, FBXO28...</i>          |
| GO:0031145                | Anaphase-promoting complex-dependent proteasomal ubiquitin-dependent protein catabolic process | 12    | 3.72E-04 | <i>CCNB1, PSMB10, PSMC6, PSMD13, PSMB6, PSMC5, PSME1, PSMC3, PSMD10, PSMD5...</i>          |
| GO:0051437                | Positive regulation of ubiquitin-protein ligase activity during mitotic cell cycle             | 12    | 5.10E-04 | <i>CCNB1, PSMB10, PSMC6, PSMD13, PSMB6, PSMC5, PSME1, PSMC3, PSMD10, PSMD5...</i>          |
| GO:0030163                | Protein catabolic process                                                                      | 35    | 5.22E-04 | <i>PSMB10, USP7, RAD23B, SPG7, PPP2R5C, UBE3C, PSMB6, UBE2D2, CUL7, CUL9...</i>            |
| GO:0051443                | Positive regulation of ubiquitin-protein ligase activity                                       | 12    | 6.90E-04 | <i>CCNB1, PSMB10, PSMC6, PSMD13, PSMB6, PSMC5, PSME1, PSMC3, PSMD10, PSMD5...</i>          |
| GO:0051439                | Regulation of ubiquitin-protein ligase activity during mitotic cell cycle                      | 12    | 7.98E-04 | <i>CCNB1, PSMB10, PSMC6, PSMD13, PSMB6, PSMC5, PSME1, PSMC3, PSMD10, PSMD5...</i>          |
| GO:0051603                | Proteolysis involved in cellular protein catabolic process                                     | 33    | 9.88E-04 | <i>PSMB10, USP7, RAD23B, PPP2R5C, UBE3C, PSMB6, UBE2D2, CUL7, CUL9, FBXO28...</i>          |
| GO:0044257                | Cellular protein catabolic process                                                             | 33    | 1.04E-03 | <i>PSMB10, USP7, RAD23B, PPP2R5C, UBE3C, PSMB6, UBE2D2, CUL7, CUL9, FBXO28...</i>          |
| GO:0051351                | Positive regulation of ligase activity                                                         | 12    | 1.06E-03 | <i>CCNB1, PSMB10, PSMC6, PSMD13, PSMB6, PSMC5, PSME1, PSMC3, PSMD10, PSMD5...</i>          |
| GO:0051436                | Negative regulation of ubiquitin-protein ligase activity during mitotic cell cycle             | 11    | 1.28E-03 | <i>PSMB10, PSMC6, PSMD13, PSMB6, PSMC5, PSME1, PSMC3, PSMD10, PSMD5, UBE2C...</i>          |

|            |                                                           |    |          |                                                                                   |
|------------|-----------------------------------------------------------|----|----------|-----------------------------------------------------------------------------------|
| GO:0051352 | Negative regulation of ligase activity                    | 11 | 1.70E-03 | <i>PSMB10, PSMC6, PSMD13, PSMB6, PSMC5, PSME1, PSMC3, PSMD10, PSMD5, UBE2C...</i> |
| GO:0051444 | Negative regulation of ubiquitin-protein ligase activity  | 11 | 1.70E-03 | <i>PSMB10, PSMC6, PSMD13, PSMB6, PSMC5, PSME1, PSMC3, PSMD10, PSMD5, UBE2C...</i> |
| GO:0032269 | Negative regulation of cellular protein metabolic process | 19 | 1.76E-03 | <i>IBTK, HSP90AB1, PSMB10, CLN3, YWHAB, UBE2C, EIF4A3, PSMC6, PSMC5, PSMB6...</i> |
| GO:0051438 | Regulation of ubiquitin-protein ligase activity           | 12 | 1.78E-03 | <i>CCNB1, PSMB10, PSMC6, PSMD13, PSMB6, PSMC5, PSME1, PSMC3, PSMD10, PSMD5...</i> |
| GO:0031398 | Positive regulation of protein ubiquitination             | 12 | 1.78E-03 | <i>CCNB1, PSMB10, PSMC6, PSMD13, PSMB6, PSMC5, PSME1, PSMC3, PSMD10, PSMD5...</i> |
| GO:0051340 | Regulation of ligase activity                             | 12 | 2.55E-03 | <i>CCNB1, PSMB10, PSMC6, PSMD13, PSMB6, PSMC5, PSME1, PSMC3, PSMD10, PSMD5...</i> |
| GO:0051248 | Negative regulation of protein metabolic process          | 19 | 2.80E-03 | <i>IBTK, HSP90AB1, PSMB10, CLN3, YWHAB, UBE2C, EIF4A3, PSMC6, PSMC5, PSMB6...</i> |
| GO:0000278 | Mitotic cell cycle                                        | 29 | 2.92E-03 | <i>PSMB10, CETN3, CETN2, CCNG2, PSMB6, PSMD5, NUDC, PSMD9, PDS5A, PAPD7...</i>    |
| GO:0031397 | Negative regulation of protein ubiquitination             | 11 | 3.25E-03 | <i>PSMB10, PSMC6, PSMD13, PSMB6, PSMC5, PSME1, PSMC3, PSMD10, PSMD5, UBE2C...</i> |
| GO:0031400 | Negative regulation of protein modification process       | 14 | 5.46E-03 | <i>PSMB10, IBTK, YWHAB, UBE2C, PSMC6, PSMC5, PSMB6, PSMD13, PSME1, PSMC3...</i>   |
| GO:0031396 | Regulation of protein ubiquitination                      | 12 | 6.60E-03 | <i>CCNB1, PSMB10, PSMC6, PSMD13, PSMB6, PSMC5, PSME1, PSMC3, PSMD10, PSMD5...</i> |
| GO:0006508 | Proteolysis                                               | 49 | 1.23E-02 | <i>UQCRC2, SPG7, MMP9, PPP2R5C, MMP7, MIPEP, MMP1, CUL7, FAP, CD46...</i>         |

GO: gene ontology.

**Table S2.** Enriched functions for downregulated differentially expressed genes (DEGs) with an enrichment score >2.5.

| Enrichment score/<br>Term | Description                                      | Co<br>unt | P        | DEGs                                                                           |
|---------------------------|--------------------------------------------------|-----------|----------|--------------------------------------------------------------------------------|
| 3.467                     |                                                  |           |          |                                                                                |
| GO:0035295                | Tube development                                 | 24        | 1.32E-05 | <i>DLC1, CAV2, FGFR4, NRP1, EPAS1, TMBIM6, SMAD4, MGP, CXCL12, SLIT2...</i>    |
| GO:0030324                | Lung development                                 | 13        | 7.37E-04 | <i>CAV2, FGFR4, EPAS1, TMBIM6, MGP, ASAH1, ALDH1A2, TCF21, LAMA5, HOXA5...</i> |
| GO:0030323                | Respiratory tube development                     | 13        | 9.15E-04 | <i>CAV2, FGFR4, EPAS1, TMBIM6, MGP, ASAH1, ALDH1A2, TCF21, LAMA5, HOXA5...</i> |
| GO:0060541                | Respiratory system development                   | 13        | 1.53E-03 | <i>CAV2, FGFR4, EPAS1, TMBIM6, MGP, ASAH1, ALDH1A2, TCF21, LAMA5, HOXA5...</i> |
| 2.802                     |                                                  |           |          |                                                                                |
| GO:0032970                | Regulation of actin filament-based process       | 12        | 5.94E-04 | <i>DLC1, SIPRI, TSC1, TNNC1, CAPZA2, ILK, ELN, SPTBN1, MYO1F, ARPC5...</i>     |
| GO:0032956                | Regulation of actin cytoskeleton organization    | 11        | 1.76E-03 | <i>DLC1, SIPRI, TSC1, CAPZA2, ILK, ELN, SPTBN1, MYO1F, ARPC5, CXCL12...</i>    |
| GO:0051493                | Regulation of cytoskeleton organization          | 13        | 3.75E-03 | <i>DLC1, CAV2, CAV1, CAPZA2, ELN, MYO1F, ARPC5, CXCL12, DSTN, SIPRI...</i>     |
| 2.672                     |                                                  |           |          |                                                                                |
| GO:0051270                | Regulation of cell motion                        | 22        | 7.21E-05 | <i>RTN4, DLC1, IL6, F10, NRP1, SP100, MYO1F, JAG1, CXCL12, LAMA2...</i>        |
| GO:0040012                | Regulation of locomotion                         | 21        | 1.64E-04 | <i>RTN4, DLC1, IL6, F10, MYO1F, JAG1, CXCL12, AGER, SLIT2, LAMA2...</i>        |
| GO:0030334                | Regulation of cell migration                     | 19        | 3.57E-04 | <i>RTN4, DLC1, IL6, F10, MYO1F, JAG1, CXCL12, LAMA2, MAPK1, LAMA3...</i>       |
| GO:0040017                | Positive regulation of locomotion                | 11        | 1.32E-02 | <i>MAPK1, IL6, F10, SIPRI, ILK, PDGFRA, HBEGF, MYO1F, CXCL12, AGER...</i>      |
| GO:0051272                | Positive regulation of cell motion               | 10        | 3.37E-02 | <i>MAPK1, IL6, F10, SIPRI, ILK, PDGFRA, HBEGF, MYO1F, BCL6, CXCL12</i>         |
| GO:0030335                | Positive regulation of cell migration            | 9         | 4.96E-02 | <i>MAPK1, IL6, F10, SIPRI, ILK, PDGFRA, HBEGF, MYO1F, CXCL12</i>               |
| 2.646                     |                                                  |           |          |                                                                                |
| GO:0035295                | Tube development                                 | 24        | 1.32E-05 | <i>DLC1, CAV2, FGFR4, NRP1, EPAS1, TMBIM6, SMAD4, MGP, CXCL12, SLIT2...</i>    |
| GO:0001763                | Morphogenesis of a branching structure           | 13        | 8.02E-05 | <i>NRP1, COL13A1, SMAD4, MGP, CXCL12, SEMA5A, TCF21, GPC3, LAMA5, HOXA5...</i> |
| GO:0048754                | Branching morphogenesis of a tube                | 12        | 9.03E-05 | <i>SEMA5A, TCF21, NRP1, GPC3, HOXA5, LAMA5, FOXF1, ILK, NOTCH4, SMAD4...</i>   |
| GO:0035239                | Tube morphogenesis                               | 14        | 1.03E-03 | <i>DLC1, NRP1, SMAD4, MGP, CXCL12, SEMA5A, TCF21, GPC3, TSC1, LAMA5...</i>     |
| GO:0048729                | Tissue morphogenesis                             | 17        | 1.08E-03 | <i>DLC1, TNNC1, RXRA, DAG1, SMAD4, JAG1, SLIT2, ALDH1A2, TCF21, GPC3...</i>    |
| GO:0002009                | Morphogenesis of an epithelium                   | 12        | 1.34E-03 | <i>DLC1, TCF21, ALDH1A2, GPC3, TSC1, HOXA5, LAMA5, FOXF1, ILK, SMAD4...</i>    |
| GO:0060562                | Epithelial tube morphogenesis                    | 9         | 3.32E-03 | <i>DLC1, TCF21, GPC3, TSC1, HOXA5, LAMA5, FOXF1, ILK, SMAD4</i>                |
| GO:0060675                | Ureteric bud morphogenesis                       | 5         | 1.27E-02 | <i>TCF21, GPC3, LAMA5, ILK, SMAD4</i>                                          |
| GO:0001658                | Branching involved in ureteric bud morphogenesis | 5         | 1.27E-02 | <i>TCF21, GPC3, LAMA5, ILK, SMAD4</i>                                          |
| GO:0001657                | Ureteric bud development                         | 6         | 1.29E-02 | <i>TCF21, GPC3, LAMA5, ILK, SMAD4, SLIT2</i>                                   |
| GO:0001656                | Metanephros development                          | 6         | 3.10E-02 | <i>TCF21, GPC3, LAMA5, ILK, SMAD4, SLIT2</i>                                   |
| GO:0060429                | Epithelium development                           | 15        | 3.13E-02 | <i>DLC1, SMAD4, DAG1, JAG1, ALDH1A2, TCF21, SIPRI, GPC3, LAMA3, TSC1...</i>    |
| GO:0001822                | Kidney development                               | 9         | 4.12E-02 | <i>TCF21, ALDH1A2, GPC3, TSC1, LAMA5, ILK, SMAD4, ZBTB16, SLIT2</i>            |

GO: gene ontology.
